# Supplementary material for: PASTE2: Partial Alignment of Multi-slice Spatially Resolved Transcriptomics Data
Source: PubMed Central journal article supplement (PMC9881963; doi:10.1101/2023.01.08.523162), 2023-01-08
Supplement: media-1.pdf [file media-1.pdf]

## 366 SUPPLEMENT

### 367 1 Estimation of the overlap percentage

368 PASTE2 requires a user-specified parameter  $s$ , the amount of mass to transport, which is interpreted as the  
369 percentage of overlap between the two slices to align. However, this parameter is not available in general. In  
370 this section, we introduce a heuristic based on the region aligned by PASTE2 to estimate  $s$ , the true overlap  
371 percentage.

372 Because the second term in the PASTE2 objective prefers symmetrical alignment, we found that if we  
373 overestimate  $s$  and visualize the regions in the two slices aligned by PASTE2, the two regions will generally  
374 be contiguous in each slice, with the true overlap region being a subset of the aligned region. However, if we  
375 underestimate  $s$ , the aligned regions will not be contiguous, where the true overlap region will have random  
376 spots left out unaligned. In other words, if we overestimate  $s$  and visualize the convex hull of the aligned  
377 region, the convex hull will contain mostly contiguous aligned spots, but if we underestimate  $s$  and visualize  
378 the convex hull of the aligned region, the convex hull will have unaligned spots randomly spread across the  
379 region. To quantify the contiguity of aligned spots, we define an *edge inconsistency score* that measures the  
380 spatial coherence of a graph with nodes colored by two clusters. Specifically, let  $G = (V, E)$  be a graph and  
381 let  $L = [l(i)]$  be a labeling of nodes where  $l(i) \in \{1, 2\}$  is the cluster label of node  $i$ . Let  $E'$  be the subset of  
382 edges where the labelling of the nodes at the two ends are different, *i.e.*  $E'$  is the cut of the graph. We define  
383 the edge inconsistency score as  $H(G, L) = \frac{|E'|}{|E|}$ , which is the percentage of edges that are in the cut. A high  
384 inconsistency score means most of the edges are in the cut, indicating the labeling of the nodes has low spatial  
385 coherence, while a low inconsistency score means the two classes of nodes are mostly contiguous in graph.

386 Given two slices  $(X, D)$  and  $(X', D')$ , we run PASTE2 with  $s$  decreasing from 1 to 0.05 with a step  
387 size of 0.05. For each  $s$ , we calculate the edge inconsistency score of the convex hull of the regions that  
388 PASTE2 selects for alignment in the two slices, with each spot labeled aligned or unaligned. Ideally, the  
389 edge inconsistency score should remain low when input  $s$  is higher than the true overlap percentage  $s^*$ ,  
390 and increases when  $s$  drops below  $s^*$ , peaking at exactly  $\frac{s^*}{2}$ . Therefore, we find  $s'_1, s'_2$  which respectively  
391 achieves the highest edge inconsistency score in the two slices, and estimate the true overlap percentage as  
392  $\hat{s} = 2 \min\{s'_1, s'_2\}$ .

### 393 2 The gene expression dissimilarity function

394 The PASTE2 objective needs an expression cost function  $c : \mathbb{R}^p \times \mathbb{R}^p \rightarrow \mathbb{R}_+$  that measures the dissimilarity  
395 level of two gene expression profiles that are potentially on the order of tens of thousands in dimension.  
396 Instead of using Kullback–Leibler divergence or Euclidean distance between two expression vectors as  
397 PASTE does, PASTE2 computes a dissimilarity cost between two high-dimensional expression vectors as  
398 follows. PASTE2 first selects the top 2000 genes with the highest UMI counts across both slices. Then, it  
399 uses GLM-PCA [44], a generalization of principle component analysis to exponential family likelihoods, to  
400 reduce the dimension of the expression vector at each spot from 2000 to 50. The dissimilarity between two  
401 50-dimensional vectors will then be calculated using standard Euclidean distance. GLM-PCA is designed  
402 to operate on raw UMI counts based on a multinomial generative model for expression vectors, avoiding  
403 the potential pitfalls of common practices such as normalization and log transformation [44, 21], hence  
404 particularly suitable for dimensionality reduction in spatial transcriptomics given its nature of sparsity and  
405 high technical variations across spots.

### 406 3 A conditional gradient algorithm for partial-FGW optimal transport

407 As in the classical conditional gradient procedure, we initialize  $\pi^{(0)}$  randomly, then for each iteration  $k$ ,  
408 PASTE2 maintains a current estimate  $\pi^{(k)} \in \Pi$ , and updates  $\pi^{(k)}$  following three steps.

#### 409 Step 1

410 The first step is to solve the linear program

$$\begin{aligned}
\tilde{\pi}^{(k)} &= \min_{\pi} \quad \langle \nabla F(\pi^{(k)}), \pi \rangle_F \\
&\quad s.t. \pi \geq \mathbf{0} \\
&\quad \pi \mathbf{1}_{n'} \leq g \\
&\quad \pi^T \mathbf{1}_n \leq g' \\
&\quad \mathbf{1}_n^T \pi \mathbf{1}_{n'} = s
\end{aligned}$$

411 where gradient  $\nabla F(\pi^{(k)})$  of  $F(\pi^{(k)})$  is

$$\nabla F(\pi^{(k)}) = (1 - \alpha)\mathbf{C} + 2\alpha\mathbf{L}(D, D') \otimes \pi^{(k)} \quad (6)$$

412 Notice that  $\nabla F(\pi^{(k)})$  is a constant matrix with respect to  $\pi$ , and thus the linear program above is an  
413 instance of the partial Wasserstein optimal transport problem [9]. We follow [11] to compute the partial  
414 Wasserstein transport plan. Specifically, we transform the partial problem into a standard, full Wasserstein  
415 problem by adding a virtual spot to each of  $g$  and  $g'$  and modify the transport cost matrix  $\nabla F(\pi^{(k)})$   
416 accordingly such that the partial transport plan can be extracted from the extended transport matrix by  
417 removing the last column and last row. More details can be found in [11]. We solve the extended standard  
418 Wasserstein problem using the algorithm proposed in [6] as implemented in the Python Optimal Transport  
419 library [18].

## 420 Step 2

421 The second step finds the step size to move along the descent direction  $\tilde{\pi}^{(k)}$  found in Step 1. That is, we find  
422 a  $\gamma^{(k)}$  satisfying

$$\gamma^{(k)} = \operatorname{argmin}_{\gamma \in [0, 1]} F(\pi^{(k)} + \gamma(\tilde{\pi}^{(k)} - \pi^{(k)})) \quad (7)$$

423 Define  $E^{(k)} = \tilde{\pi}^{(k)} - \pi^{(k)}$  and a function  $\Phi : [0, 1] \rightarrow \mathbb{R}$  such that

$$\Phi(\gamma) = F(\pi^{(k)} + \gamma(\tilde{\pi}^{(k)} - \pi^{(k)})) \quad (8)$$

424 We want to minimize  $\Phi(\gamma)$  on  $[0, 1]$ . We can rewrite  $\Phi(\gamma)$  as

$$\begin{aligned}
\Phi(\gamma) &= F(\pi^{(k)} + \gamma(\tilde{\pi}^{(k)} - \pi^{(k)})) \\
&= F(\pi^{(k)} + \gamma E^{(k)}) \\
&= (1 - \alpha)\langle \mathbf{C}, \pi^{(k)} + \gamma E^{(k)} \rangle_F + \alpha\langle \mathbf{L}(D, D') \otimes (\pi^{(k)} + \gamma E^{(k)}), \pi^{(k)} + \gamma E^{(k)} \rangle_F \\
&= (1 - \alpha)(\langle \mathbf{C}, \pi^{(k)} \rangle_F + \gamma\langle \mathbf{C}, E^{(k)} \rangle_F) + \alpha(\gamma^2\langle \mathbf{L}(D, D') \otimes E^{(k)}, E^{(k)} \rangle_F \\
&\quad + 2\gamma\langle \mathbf{L}(D, D') \otimes E^{(k)}, \pi^{(k)} \rangle_F + \langle \mathbf{L}(D, D') \otimes \pi^{(k)}, \pi^{(k)} \rangle_F) \\
&= (1 - \alpha)\langle \mathbf{C}, \pi^{(k)} \rangle_F + \gamma(1 - \alpha)\langle \mathbf{C}, E^{(k)} \rangle_F + \gamma^2\alpha\langle \mathbf{L}(D, D') \otimes E^{(k)}, E^{(k)} \rangle_F \\
&\quad + \gamma 2\alpha\langle \mathbf{L}(D, D') \otimes E^{(k)}, \pi^{(k)} \rangle_F + \alpha\langle \mathbf{L}(D, D') \otimes \pi^{(k)}, \pi^{(k)} \rangle_F \\
&= \gamma^2\alpha\langle \mathbf{L}(D, D') \otimes E^{(k)}, E^{(k)} \rangle_F + \gamma((1 - \alpha)\langle \mathbf{C}, E^{(k)} \rangle_F + 2\alpha\langle \mathbf{L}(D, D') \otimes E^{(k)}, \pi^{(k)} \rangle_F) \\
&\quad + (1 - \alpha)\langle \mathbf{C}, \pi^{(k)} \rangle_F + \alpha\langle \mathbf{L}(D, D') \otimes \pi^{(k)}, \pi^{(k)} \rangle_F \\
&= a\gamma^2 + b\gamma + c
\end{aligned}$$

where  $a, b, c$  are constants calculated from known quantities

$$\begin{aligned} a &= \alpha \langle \mathbf{L}(D, D') \otimes E^{(k)}, E^{(k)} \rangle_F \\ b &= (1 - \alpha) \langle \mathbf{C}, E^{(k)} \rangle_F + 2\alpha \langle \mathbf{L}(D, D') \otimes E^{(k)}, \pi^{(k)} \rangle_F \\ c &= (1 - \alpha) \langle \mathbf{C}, \pi^{(k)} \rangle_F + \alpha \langle \mathbf{L}(D, D') \otimes \pi^{(k)}, \pi^{(k)} \rangle_F \end{aligned}$$

425 Now, minimizing  $\Phi(\gamma)$  on  $[0, 1]$  is just minimizing a univariate quadratic function on  $[0, 1]$ , which can be  
426 done by testing the convexity and finding the axis of symmetry.

### 427 Step 3

428  $\tilde{\pi}^{(k)}$  is calculated in step 1.  $\gamma^{(k)}$  is calculated in step 2. Now update

$$\pi^{(k+1)} = \pi^{(k)} + \gamma^{(k)}(\tilde{\pi}^{(k)} - \pi^{(k)}) \quad (9)$$

429 In practice, we test convergence by comparing the difference between the objective cost of  $\pi^{(k)}$  and  
430  $\pi^{(k+1)}$  to a small constant. Algorithm 1 shows the pseudocode of our conditional gradient algorithm to  
optimize the partial-FGW objective.

---

#### Algorithm 1: Conditional gradient algorithm for partial-FGW

---

**Input:** Transport cost matrix  $\mathbf{C}$ ; pairwise cost tensor  $\mathbf{L}(D, D')$ ; feasible region  $\mathcal{P}$ ; balance  
parameter  $\alpha$ ; convergence parameter  $\delta$

- 1 **Initialize** initial guess  $\pi^{(0)} \in \Pi$ ;
  - 2 **while**  $F(\pi^{(k+1)}) - F(\pi^{(k)}) > \delta$  **do**
  - 3      $\nabla F(\pi^{(k)}) = (1 - \alpha)\mathbf{C} + 2\alpha\mathbf{L}(D, D') \otimes \pi^{(k)}$  // Gradient computation
  - 4      $\tilde{\pi}^{(k)} = \operatorname{argmin}_{\pi \in \Pi} \langle \nabla F(\pi^{(k)}), \pi \rangle_F$  // Step 1: Solve partial-W subproblem
  - 5      $\gamma^{(k)} = \operatorname{argmin}_{\gamma \in [0, 1]} F(\pi^{(k)} + \gamma(\tilde{\pi}^{(k)} - \pi^{(k)}))$  // Step 2: Line search
  - 6      $\pi^{(k+1)} = \pi^{(k)} + \gamma^{(k)}(\tilde{\pi}^{(k)} - \pi^{(k)})$  // Step 3: Update
  - 7 **return**  $\pi^{(k)}$
- 

431

## 432 4 The histological image dissimilarity matrix

433 The H&E image associated with each slice can be represented by a matrix  $H \in \mathbb{N}^{n \times 3}$ , where  $n$  is the number  
434 of spots on the slice and the  $i$ -th row  $\mathbf{h}_i$  is the RGB value of the pixel of spot  $i$  in the H&E image. In reality,  
435 a spot may occupy a circle instead of a pixel in the image, so we take the average value of all pixels in the  
436 circle as the RGB value for the spot. Given two ST slices  $(X, D, H)$  and  $(X', D', H')$ , we integrate the H&E  
437 image information into the partial-FGW framework by defining a cost matrix  $\mathbf{C}_{image} \in \mathbb{R}^{n \times n'}$  to encode the  
438 Euclidean distance between the RGB value of each spot of the first slice and the RGB value of each spot of  
439 the second slice, and spots with similar histology achieve lower costs. That is,  $[\mathbf{C}_{image}]_{ij} = \|\mathbf{h}_i - \mathbf{h}'_j\|_2$ . If  
440 PASTE2 aligns spot  $i$  to spot  $j$ , then both the gene expression profiles and the histology RGB values of spot  $i$   
441 and  $j$  should be similar.

## 442 5 Optimal projection and 3D reconstruction

443 Given a series of consecutive slices  $(X^{(1)}, Z^{(1)}), \dots, (X^{(t)}, Z^{(t)})$ , where  $X$  is the gene expression matrix  
444 and  $Z$  is the 2D location matrix, for  $k = 1, \dots, t - 1$ , we seek to project the coordinates of slice  $k + 1$   
445 onto the coordinates of slice  $k$  such that the partial alignment  $\pi^{(k)}$  between the two slices is respected. The  
446 projection is defined by a rotation matrix  $R \in \mathbb{R}^{2 \times 2}$  and a translation vector  $t \in \mathbb{R}^2$  that is applied to the  
447 spatial coordinates  $Z^{(k+1)}$  of slice  $k + 1$ . The derivation here is similar to the 3D reconstruction in PASTE,  
448 but can handle partial alignment matrices.

449 Given ST slices with spatial coordinates  $Z \in \mathbb{R}^{2 \times n}$  and  $W \in \mathbb{R}^{2 \times n'}$ , and a partial alignment  $\pi \in$   
 450  $\mathcal{P}(g, g', s)$  between the two slices, we want to find a rotation matrix  $R \in \mathbb{R}^{2 \times 2}$  and a translation vector  
 451  $t \in \mathbb{R}^2$  for  $W$  that minimizes

$$Q(t, R) = \sum_{i,j} \pi_{ij} \|Z_{.i} - RW_{.j} - t\|^2 \quad (10)$$

452 We first show that we can assume no translation is needed ( $t = 0$ ) by scaling both  $Z$  and  $W$ . Assume  $R$   
 453 is fixed, we take the derivative of  $Q$  with respect to  $t$  and compare to 0

$$\begin{aligned} \frac{\partial Q}{\partial t} &= -2 \sum_{i,j} \pi_{ij} (Z_{.i} - RW_{.j} - t) \\ &= -2 \sum_i Z_{.i} \sum_j \pi_{ij} + 2 \sum_j RW_{.j} \sum_i \pi_{ij} + 2t \sum_{i,j} \pi_{ij} \\ &= -2 \sum_i Z_{.i} p_i + 2 \sum_j RW_{.j} q_j + 2ts \\ &= -2 \sum_i Z_{.i} p_i + 2R \sum_j W_{.j} q_j + 2ts \\ &= -2Zp + 2RWq + 2ts = 0 \end{aligned}$$

454 where  $p = \pi \mathbf{1}_{n'}$ ,  $q = \pi^T \mathbf{1}_n$ ,  $s = \mathbf{1}_n^T \pi \mathbf{1}_{n'}$ . We have  $t = \frac{1}{s} (Zp - RWq)$ . Then, substitute  $t =$   
 455  $\frac{1}{s} (Zp - RWq)$  into  $Q$ , we get

$$\begin{aligned} Q(t, R) &= \sum_{i,j} \pi_{ij} \|Z_{.i} - RW_{.j} - t\|^2 \\ &= \sum_{i,j} \pi_{ij} \|Z_{.i} - RW_{.j} - \frac{1}{s} Zp + \frac{1}{s} RWq\|^2 \\ &= \sum_{i,j} \pi_{ij} \|(Z_{.i} - \frac{1}{s} Zp) - R(W_{.j} - \frac{1}{s} Wq)\|^2 \end{aligned}$$

456 Since  $\frac{1}{s} Zp$  and  $\frac{1}{s} Wq$  does not depend on  $R$ , if we replace  $Z_{.i}$  with  $Z_{.i} - \frac{1}{s} Zp$  and  $W_{.j}$  with  $W_{.j} - \frac{1}{s} Wq$ ,  
 457  $Q$  is minimized with respect to  $t$  and we only need to find the optimal rotation  $R$ . Hence we can assume no  
 458 translation is needed by scaling both  $R$  and  $W$ .

459 To find the optimal rotation  $R$ , rewrite  $Q$  in matrix notation

$$\begin{aligned}
Q(R) &= \sum_{i,j} \pi_{ij} \|Z_{\cdot i} - RW_{\cdot j} - t\|^2 \\
&= \sum_{i,j} \pi_{ij} (Z_{\cdot i} - RW_{\cdot j} - t)^T (Z_{\cdot i} - RW_{\cdot j} - t) \\
&= \sum_{i,j} \pi_{ij} (Z_{\cdot i}^T Z_{\cdot i} - Z_{\cdot i}^T RW_{\cdot j} - W_{\cdot j}^T R Z_{\cdot i} + W_{\cdot j}^T R^T RW_{\cdot j}) \\
&= -2 \sum_{i,j} \pi_{ij} (Z_{\cdot i}^T RW_{\cdot j}) + \alpha \\
&= -2 \text{Tr}(Z^T RW \pi^T) + \alpha \\
&= -2 \text{Tr}(RW \pi^T Z^T) + \alpha
\end{aligned}$$

460 where  $\alpha$  is a constant independent of  $R$ . Let  $U\Sigma V^T$  be the SVD decomposition of the matrix  $W \pi^T Z^T$ .  
461 Then,

$$\begin{aligned}
Q(R) &= -2 \text{Tr}(RW \pi^T Z^T) + \alpha \\
&= -2 \text{Tr}(RU\Sigma V^T) + \alpha \\
&= -2 \text{Tr}(\Sigma V^T RU) + \alpha
\end{aligned}$$

462 Since  $V, R, U$  are all orthonormal matrices, and  $\Sigma$  is a diagonal matrix with positive entries, the maximum  
463 of  $\text{Tr}(\Sigma V^T RU)$ , hence the minimum of  $Q$ , will be achieved when  $V^T RU = I$ . Therefore, the optimal  
464 rotation that minimizes  $Q$  is  $R = VU^T$ .

465 By finding the optimal projection for each slice pair, we project each slice onto the same 2D coordinate  
466 grid and create a common coordinate system for all slices in 3D where the z-axis is determined by the actual  
467 distance between each slice in the tissue.

## 468 6 Simulation procedure

469 The simulated partial slices are based on DLPFC sample 151674, where each spot is labeled with a manual  
470 cortical layer annotation from [32]. This slice contains 3635 spots and 12381 genes after filtering out all the  
471 spots and genes with less than 100 transcript counts overall. We generated two partially overlapping subslices  
472 from this slice in the following way.

- 473 1. Let  $s$  be a percentage number between 0 and 100 (or equivalently, fraction number between 0 and 1.)  
474 We choose two horizontal lines on the slice, line 1 and line 2, with line 1 below line 2, that generates  
475 two subslices. The upper subslice is the subslice above line 1, and the lower subslice is the subslice  
476 below line 2. The upper and lower subslice overlap at  $s$  percent of their spots.  $s$  controls the exact  
477 locations of line 1 and line 2 that cuts the slice into subslices.
- 478 2. For each spot  $i$  in the lower subslice, we resample its gene expression profile as follows. Let  $v_i$  be the  
479 original gene expression vector of spot  $i$ , and  $\mu_i = \sum_i v_i$  be the total read count. Let  $\delta$  be a small pesu-  
480 docount. We resample  $v_i$  according to a multinomial distribution  $v_i \sim \text{Multinomial}(\mu_i, \frac{v_i + (\delta \cdot 0.0002 \cdot \mu_i) \cdot \mathbf{1}_p}{\mu_i + (\delta \cdot 0.0002 \cdot \mu_i) \cdot p})$ ,  
481 where  $p$  is the number of genes and  $\mathbf{1}_p$  is an all-one vector of length  $p$ .

482 That is, for each spot in the bottom slice, we add a small pseudocount to each gene in proportion to  
483 the total read counts of the spot, and then resample the expression profile under a multinomial distribution

484 defined by the read counts of each gene after the addition of the pseudocount. This way, we have a different  
485 pseudocount for each spot proportional to the spot’s total read count so that the noises we introduce are  
486 the same across spots. We choose the ratio as  $0.0002 \cdot \mu_i$  for a spot with read count  $\mu_i$  so that the median  
487 pseudocount added across spots would be  $\delta$  because the median read counts for each spot in this slice is about  
488 5000.

## 489 **7 Label Transfer Adjusted Rand Index (LTARI)**

490 We evaluate the alignment accuracy for partial slice alignments using what we call the Label Transfer  
491 Adjusted Rand Index (LTARI). LTARI is a score that measures the ability of the alignment to transfer labels  
492 of the aligned region from one slice to the other. Intuitively, a good partial alignment would find and align  
493 spots with the same cell type, hence we define a score that measures the alignment accuracy as the agreement  
494 of cell type labels of aligned pairs of spots. Note that the ground truth annotation of cell type of each spot  
495 should be available for calculating LTARI. Specifically, for each spot  $j$  in the second slice that is aligned by  
496 PASTE2, the alignment induces a new cell type label for the spot by assigning it  $\ell(j) = \ell(\operatorname{argmax}_i \pi_{ij})$ , the  
497 label of the spot  $i$  in the first slice that achieves the highest  $\pi_{ij}$  over all the spots in the first slice. That is, we  
498 assign each aligned spot in the second slice the label of the spot in the first slice that is mostly likely aligned  
499 to it according to the computed alignment. This assignment transfers the labels of spots from the first slice  
500 to the second slice in the aligned region. We then compare this transferred labeling with the ground truth  
501 labeling of the aligned region of the second slice and compute the ARI of the two clusterings. For PASTE2,  
502 the Label Transfer ARI is calculated on the region that PASTE2 chooses to align since not all spots receive  
503 an alignment, while for PASTE the Label Transfer ARI is calculated for the entire slice because PASTE have  
504 to align every spot to some spot in the other slice. A high LTARI indicates that the (partial) alignment tends  
505 to align each spot to some spot on the other slice with the same cell type label, hence corresponds to a better  
506 alignment. Notice that LTARI can be defined in the opposite direction, comparing the transferred labeling  
507 with the ground truth labeling of the first slice, but in practice we do not observe a significant gap between  
508 the LTARI of the two directions.

## 509 **8 Benchmarking PASTE2 with other methods**

510 We benchmarked PASTE2 against PASTE, Pamona, and Tangram on the DLPFC dataset. Both PASTE2  
511 and Pamona are partial alignment methods that can handle partially overlapped datasets, while PASTE and  
512 Tangram assume the two datasets to align have the same underlying cellular structure. We treated both  
513 ST slices as scRNA-seq datasets for Pamona by dropping the information about spatial coordinates. Since  
514 Pamona is a partial alignment algorithm, it takes as input the number of shared cells between the two datasets,  
515 and we provided the ground-truth number of spots (70% of total spots) in the overlap region of the two slices.  
516 To run Tangram, we treated the first slice as a scRNA-seq dataset and mapped its spots onto the second ST  
517 slice. We used the uniform density prior for Tangram such that the mapping returned by Tangram will have  
518 uniform marginals over each spot as in PASTE. We ran Tangram for 500 iterations instead of the default  
519 1000 because empirically the loss does not change much after 500 iterations. We ran PASTE2 with the  
520 ground-truth overlap percentage  $s$  as well.

## 521 **9 Evaluation of the estimation of overlap percentages**

522 We evaluated PASTE2’s model selection procedure (Supplement §1) to estimate the overlap percentage  $s$  on  
523 the simulated dataset described in §3.1 and the real ST slices described in §3.2. For the simulated dataset, we  
524 used PASTE2 to estimate the overlap percentage of simulated pairs of slices which overlap at 90%, 70%,  
525 50%, and 30% of their areas, and with pseudocount added to the gene expression data  $\delta = 0.1, 1.0, 2.0, 3.0$ .  
526 For the real slices, we used PASTE2 to estimate the overlap percentage of all pairs of adjacent subslices of all  
527 individuals analyzed in §3.2, with each pair roughly overlap at 70% of their areas.

528 The estimation result on simulated pairs of slices indicates that when the overlap between the two slices

529 is high ( $> 50\%$ ), PASTE2 estimates the overlap percentage accurately, with all estimations within 10% of the  
 530 ground truth even when the noise level  $\delta = 3.0$  (Fig. S12a). When the overlap is less than 50%, PASTE2 still  
 531 correctly recovers the overlap when  $\delta$  is reasonably small.

532 On pairs of DLPFC subslices, both horizontally and vertically overlapping, for 8 out of 18 pairs, the  
 533 PASTE2 estimation of overlap percentage is within 10% of the reference overlap, and the estimations of 16  
 534 out of 18 pairs are within 20% of the reference overlap (Fig. S12b). However, we note that the 70% reference  
 535 overlap simply means that the rectangular boxes used to crop out subslices, as shown in Fig. S8, have about  
 536 70% of their areas overlapping between each pair. Due to factors such as variations in shapes of the tissue and  
 537 different geometries of each layer in different slices, the true overlap percentage may differ from 70%. For  
 538 example, comparing the 3D reconstruction (optimal projection) of pair BC of sample 1 based on an alignment  
 539 with 70% of overlap and the 3D reconstruction of the same pair based on an alignment with 30% of overlap  
 540 (estimated by PASTE2), it is clear that the PASTE2 estimation of 30% leads to a better reconstruction than  
 541 the reference 70% (Fig. S13), and the alignment LTARI increases from 0.07 to 0.18. Additionally, we want  
 542 to mention that the differences in geometries of layers across slices, complicated with technical artifacts such  
 543 as sharp difference in UMI counts across layers, may result in model unidentifiability issues.

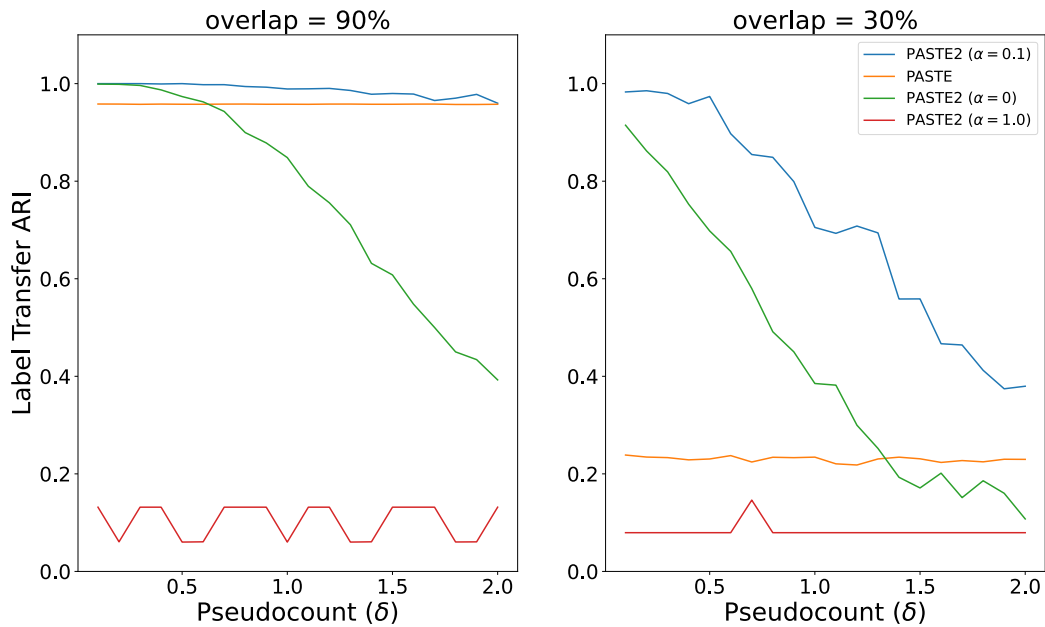

**Figure 6: Additional PASTE2 results on simulated data.** Label Transfer ARI of the alignment result versus the added pseudocount ( $\delta$ ) for PASTE2  $\alpha = 0$  (gene expression information only), PASTE2  $\alpha = 1$  (spatial information only), PASTE2  $\alpha = 0.1$  (both), and PASTE (full alignment), for overlap percentages 30% and 90%.

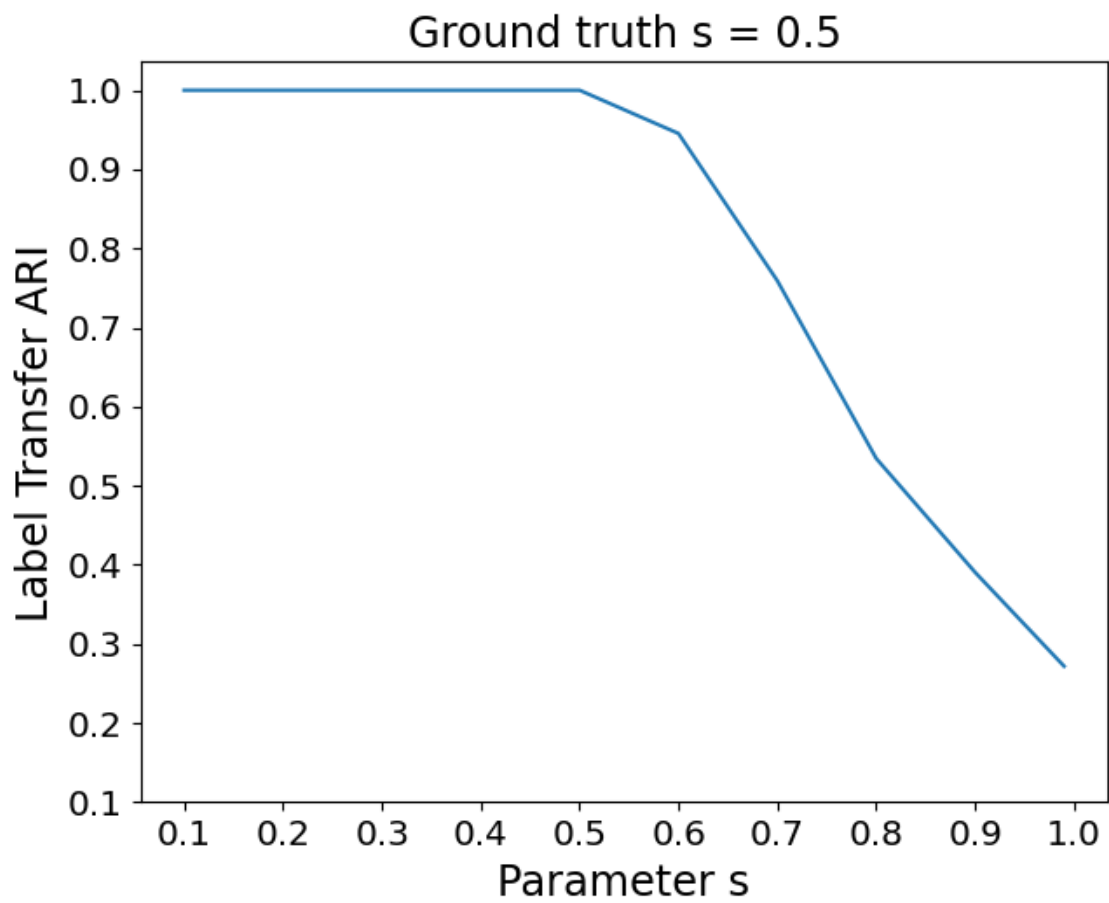

**Figure 7: Effect of the overlap percentage parameter  $s$  on PASTE2 results.** Label Transfer ARI of the PASTE2 alignment result for varying values of the parameter  $s$  on a simulated pair with overlap percentage  $s = 0.5$ .



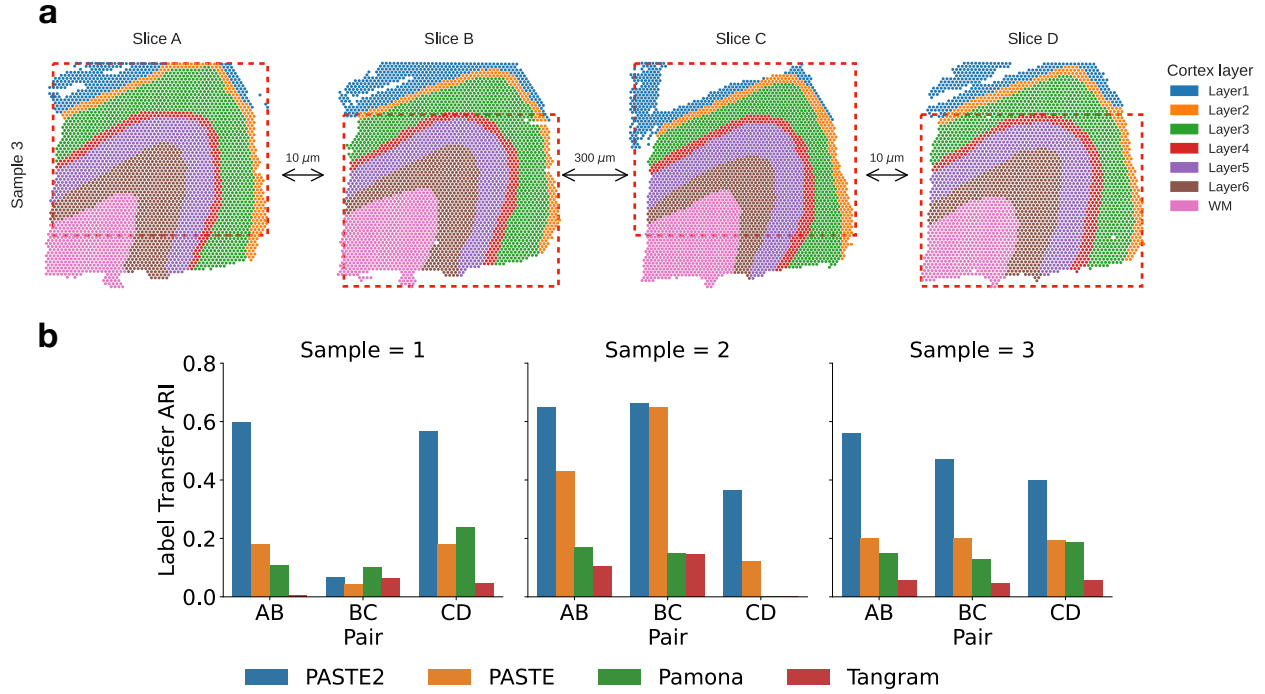

**Figure 8: Horizontal partial alignment tasks.** **a**, Horizontal (red bounding boxes) subslices cropped out of four slices from sample 3. Each pair of adjacent subslices overlap at 70% of the areas. **b**, LTARI of alignments of each pair of adjacent horizontal subslices for PASTE2, PASTE, Pamona, and Tangram.

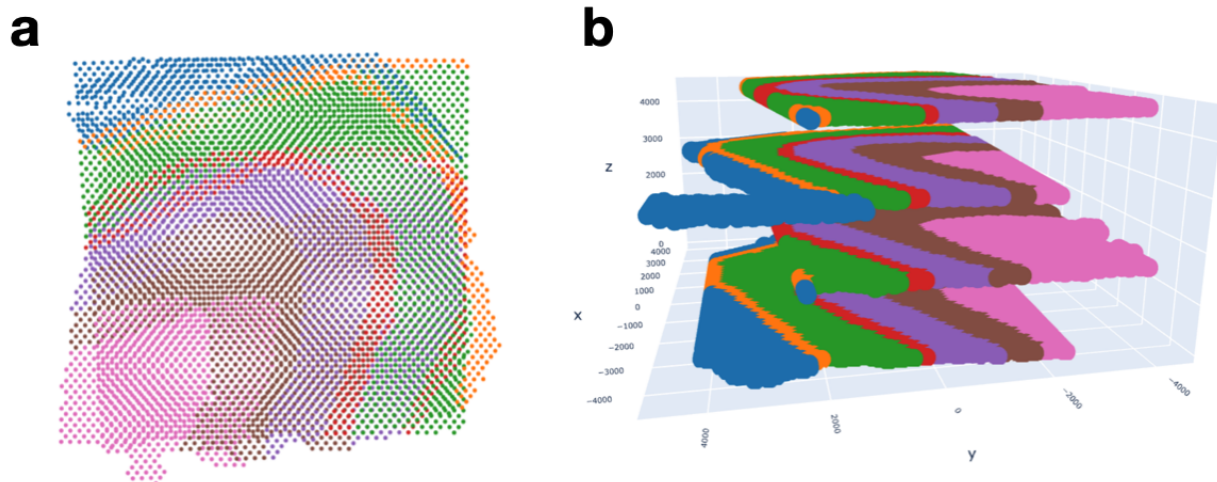

**Figure 9: Spatial reconstruction of DLPFC slices.** **a**, Optimal projection of vertical subslices of sample 3 slice AB based on PASTE alignment. **b**, PASTE2 3D reconstruction of the tissue of sample 3 from four horizontal partial slices. Note that  $z$ -axis is not to scale.

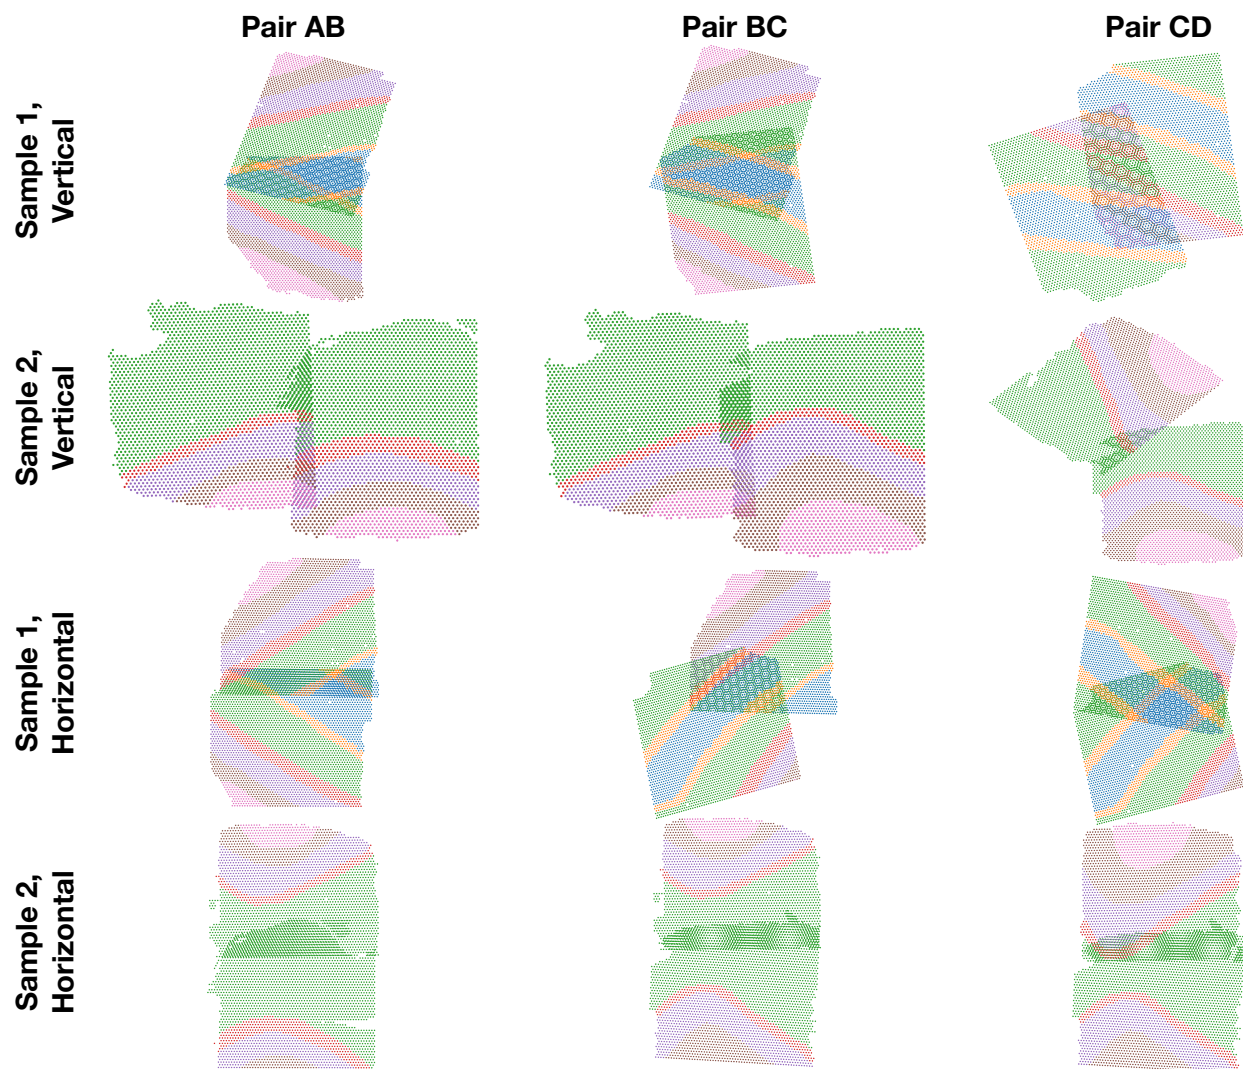

**Figure 10: Alignment results of STUtility on partial DLPFC slices.** Each pair of adjacent vertical and horizontal partial slices aligned by STUtility. Each pair is plotted according to the aligned coordinates output by STUtility.

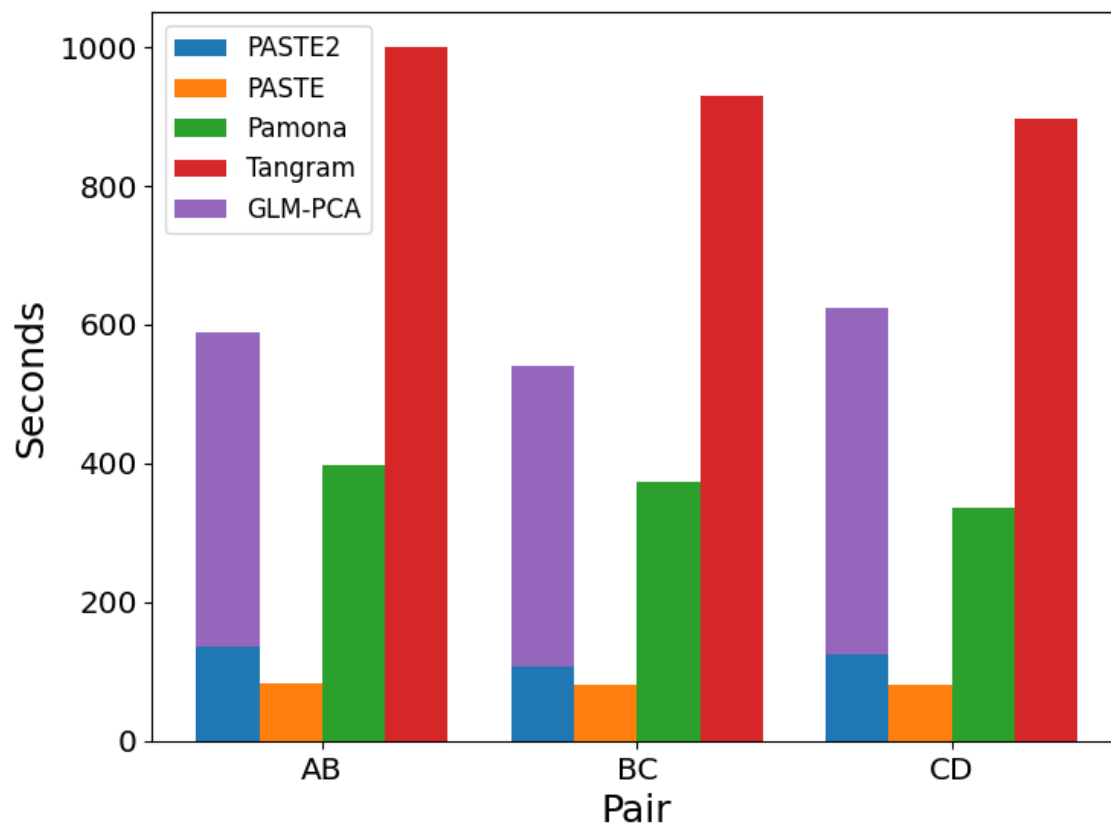

**Figure 11: Running time of four methods on DLPFC sample 3.** The running time of PASTE2, PASTE, Pamona, and Tangram on the vertical subslice pairs of DLPFC sample 3. The running time of PASTE2 is broken into two parts: time spent on the GLM-PCA subroutine by calling another library, and the time spent on the PASTE2 conditional gradient optimization procedure.

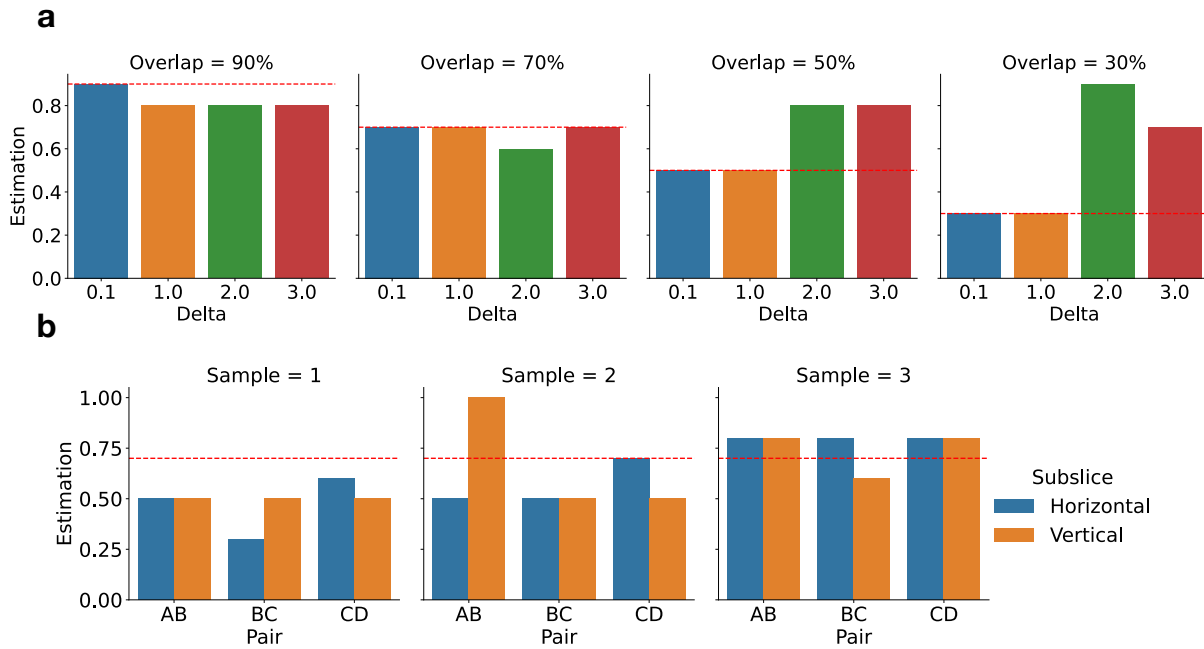

**Figure 12: PASTE2 estimation of overlap percentages on simulated and real DLPFC slices.** **a**, PASTE2 estimation of overlap percentages for simulated pairs of slices with four different overlap percentages, each with four gene expression noise levels. The red dotted line denotes the ground truth. **b**, PASTE2 estimation of overlap percentages of horizontal and vertical subslices cropped from real DLPFC slices. The red dotted line denotes the 70% reference overlap.

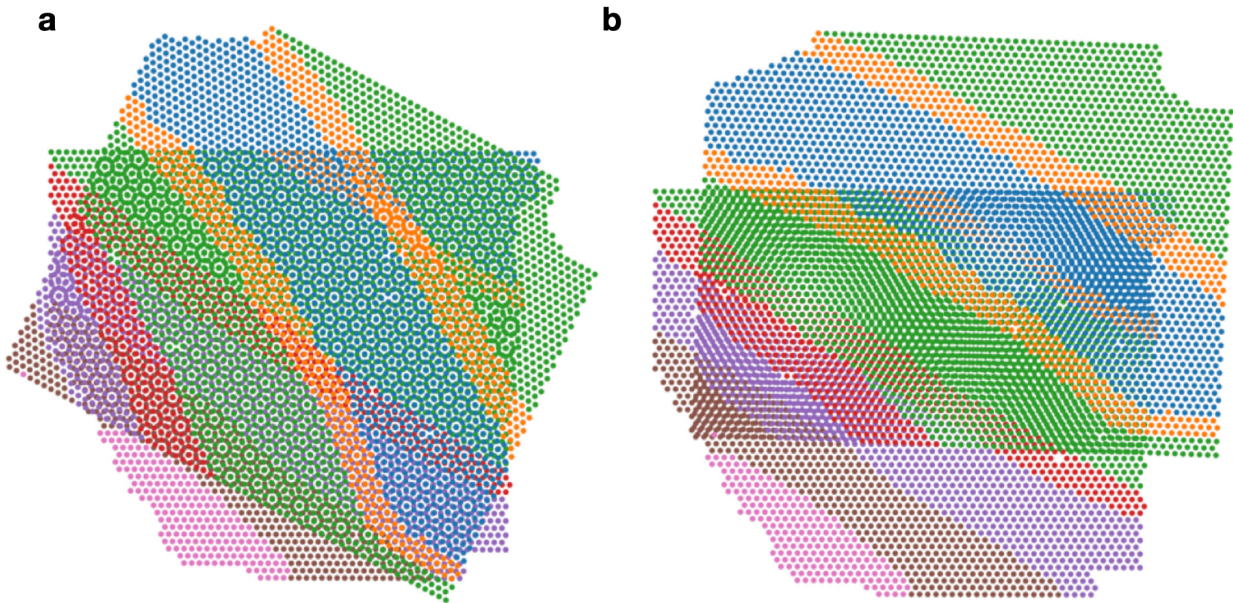

**Figure 13: PASTE2 3D reconstruction of sample 1 pair BC.** **a**, Reconstruction based on PASTE2 alignment with input  $s = 0.7$ . **b**, Reconstruction based on PASTE2 alignment with input  $s = 0.3$ .

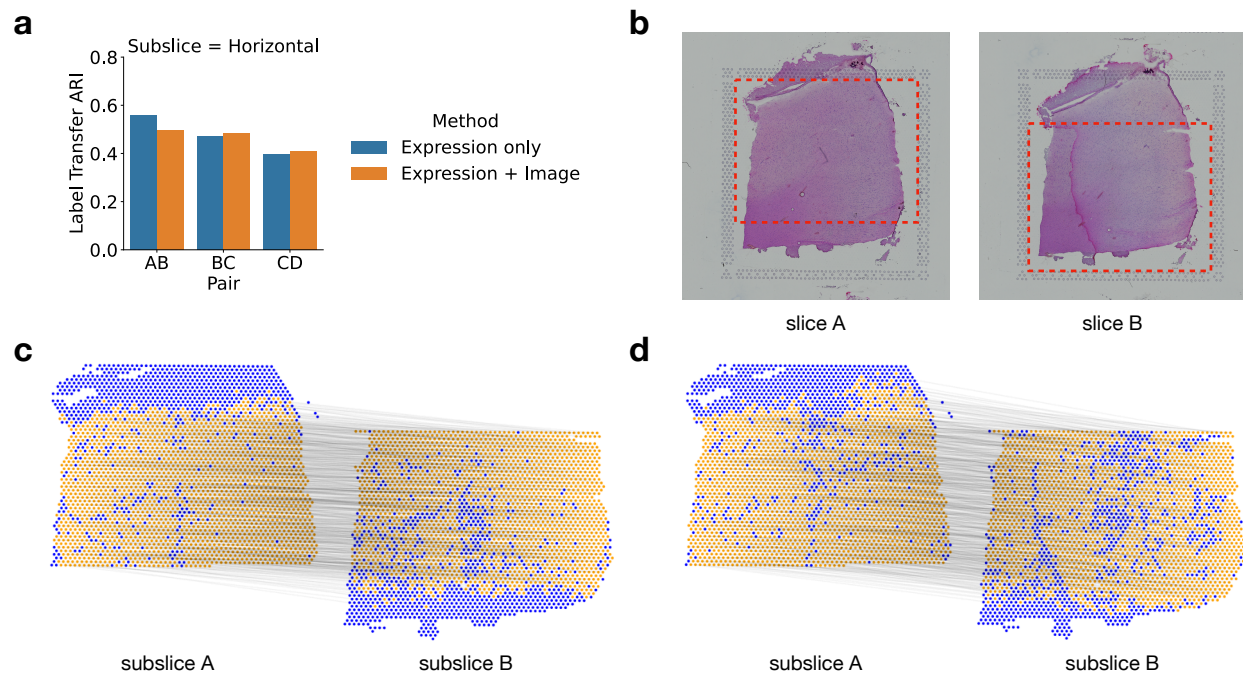

**Figure 14: Effect of histological image information on alignment of horizontal subslices of sample 3.** **a**, Comparing LTARI of PASTE2 alignments using expression information only with both expression and image information, for horizontal subslices of DLPFC sample 3. Spatial information is used in both modes. **b**, Histological images of sample 3 slice A and slice B. The red boxes bound the horizontal subslices cropped for partial alignment. The lower part of subslice A overlaps with the upper part of slice B. **c**, Visualization of PASTE2 alignment of the subslice pair when using gene expression information only. Yellow spots are spots that PASTE2 chooses to align, and blue spots are decided non-overlapping. The black lines connect pairs of spots aligned by PASTE2 with high weight. **d**, Visualization of PASTE2 alignment of the subslice pair when using both gene expression and histological image information.

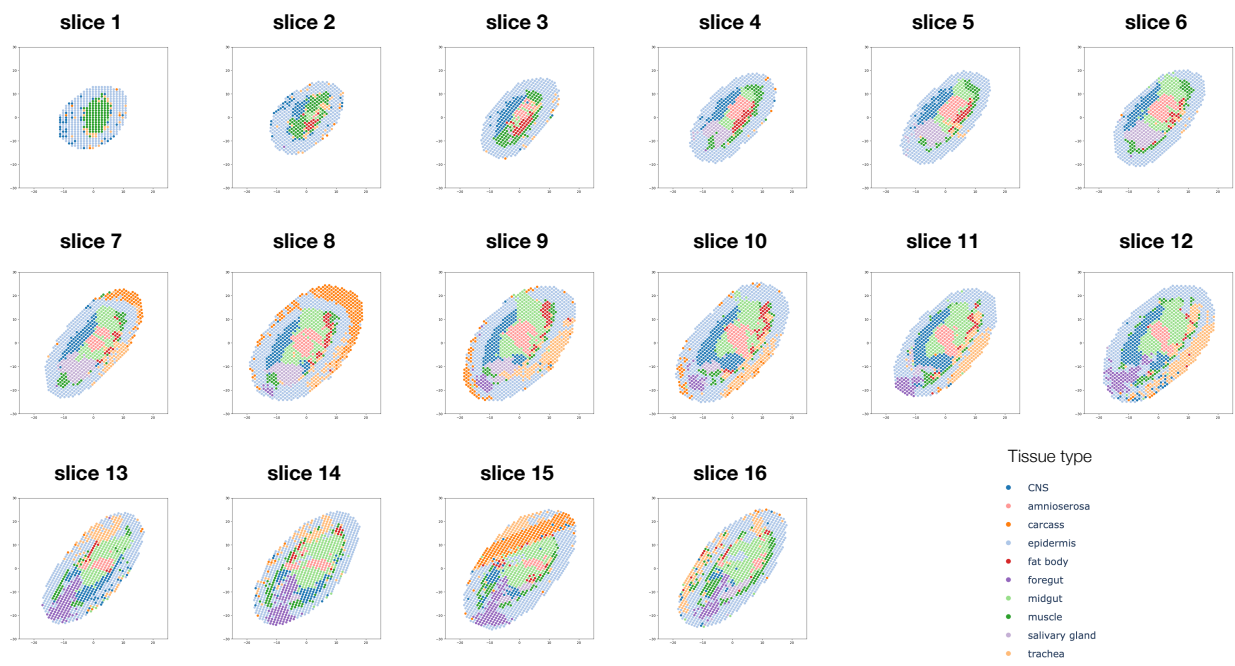

**Figure 15: Stereo-seq slices of E14-16 Drosophila embryo.** Visualization of 16 slices of E14-16 Drosophila embryo. Coloring of spots is according to cell type annotations in [47].

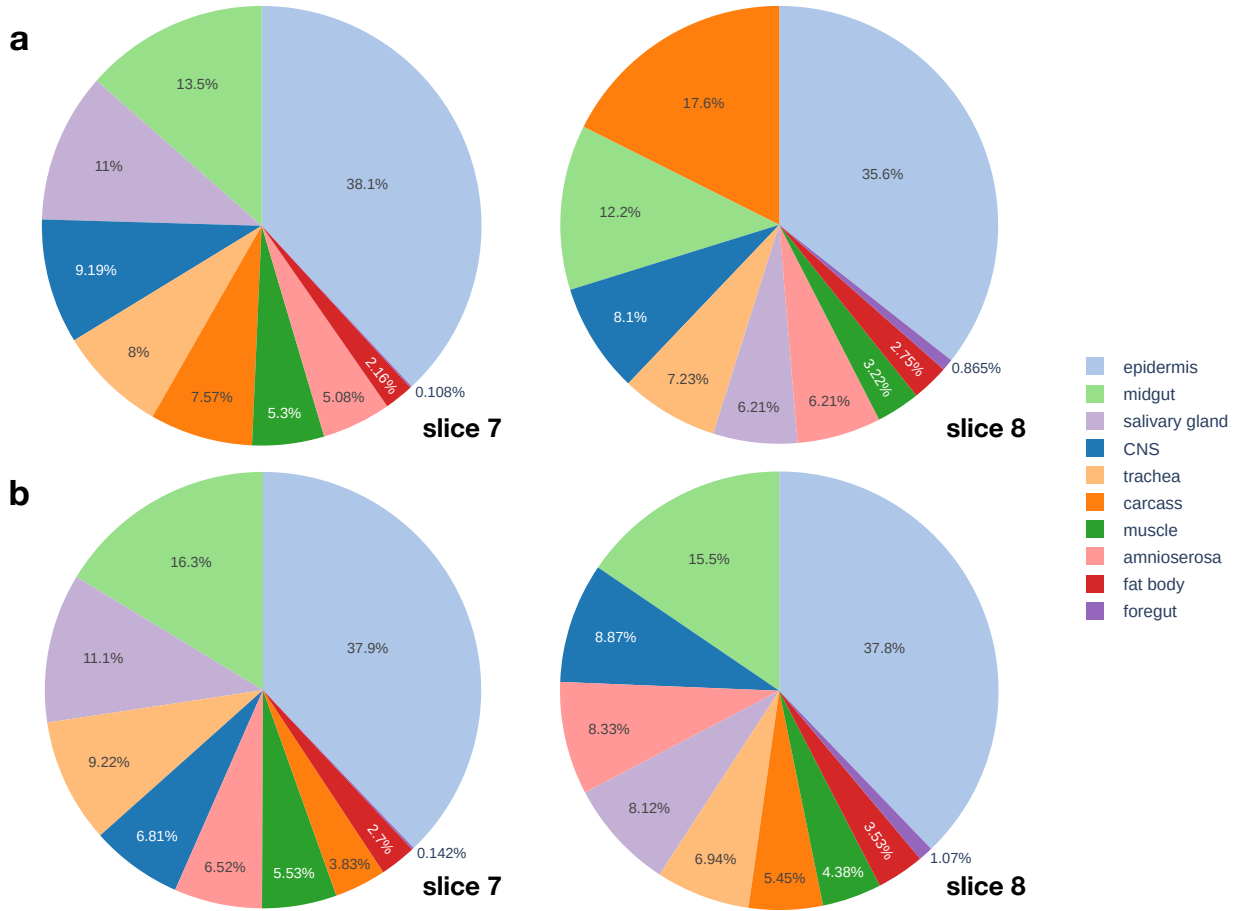

**Figure 16: Cell type compositions of slice 7 and slice 8 before and after alignment. a,** Cell type compositions of original slice 7 and slice 8. Both carcass and salivary gland cells show large imbalance between the two slices. **b,** Cell type compositions of the aligned regions in slice 7 and slice 8.

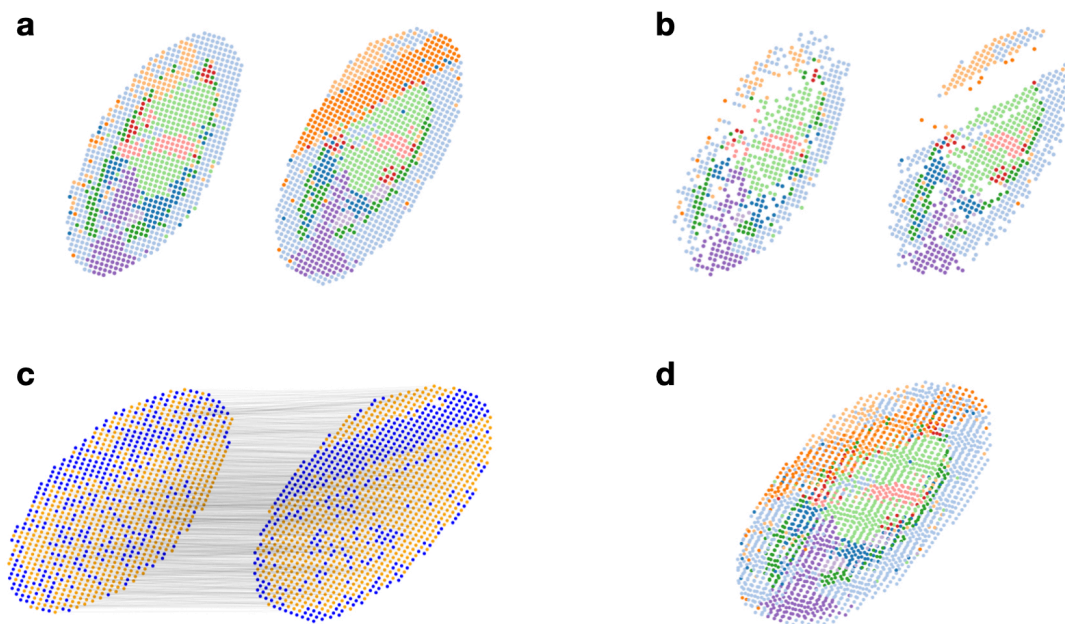

**Figure 17: PASTE2 alignment of *Drosophila* embryo slice 14 and slice 15.** **a**, Visualization of the two slices before alignment. Slice 15 has a stripe of carcass cells (orange color) that is not present in slice 14. **b**, Visualization of the spots from the two slices that are chosen to be aligned by PASTE2. The orange spots are left out. **c**, The PASTE2 alignment. Yellow spots are spots that PASTE2 chooses to align, and blue spots are decided non-overlapping. The black lines denote the actual spot-spot alignment. **d**, Optimal projection of slice 14 onto slice 15 based on the PASTE2 alignment.

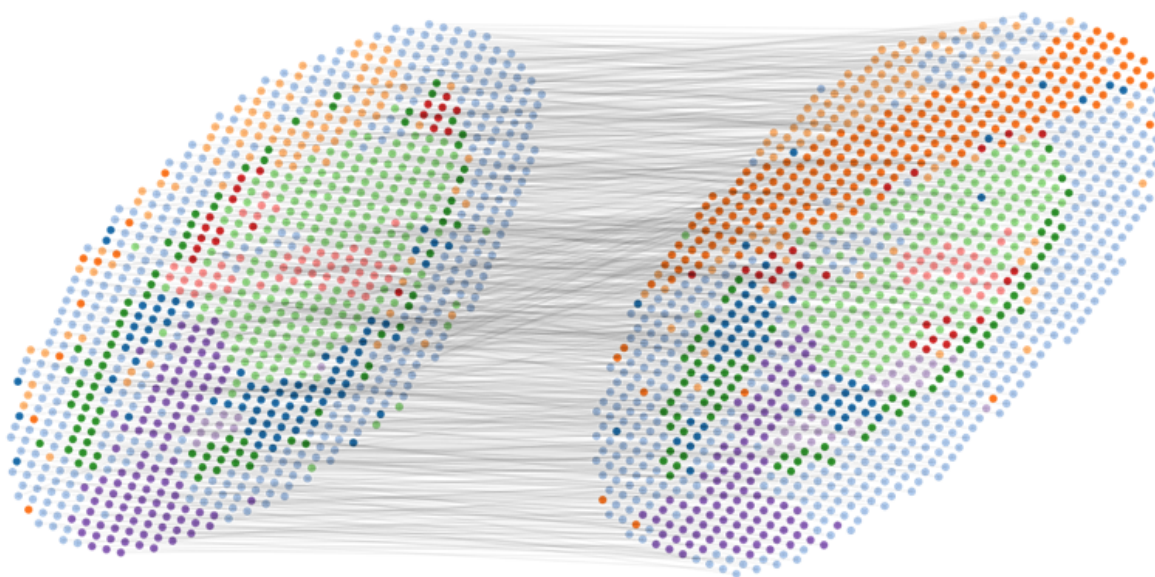

**Figure 18: PASTE alignment of *Drosophila* embryo slice 14 and slice 15.** The black lines denote the actual spot-spot alignment. The carcass (orange) spots on slice 15 are mapped arbitrarily.



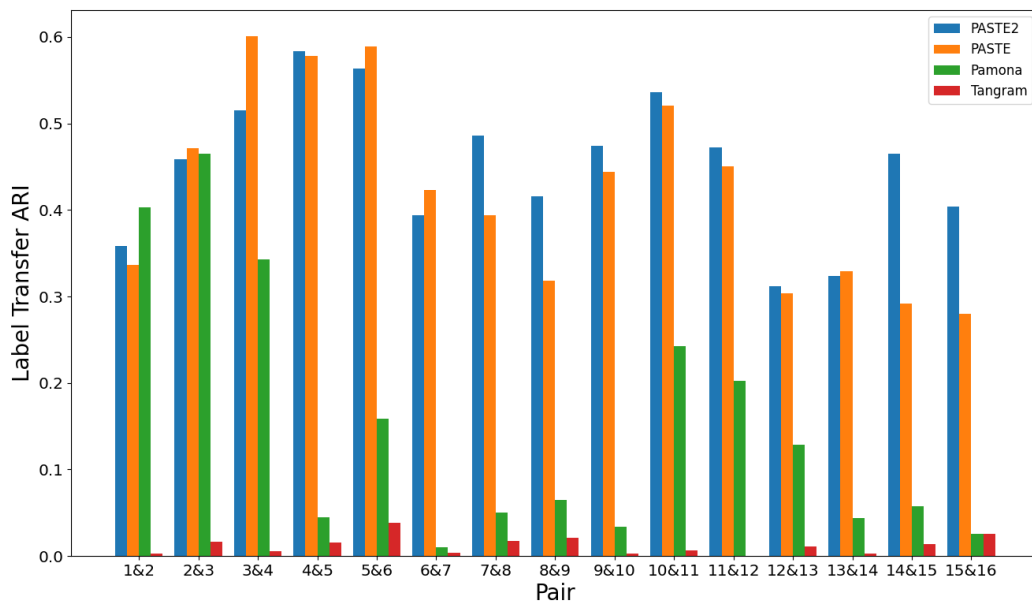

**Figure 19: Comparison of the results of four methods aligning each pair of adjacent slices of the Drosophila embryo.** LTARI of pairwise alignments computed by PASTE2, PASTE, Pamona, and Tangram for each pair of adjacent slices.
